# Supplementary material
Source: publisher figshare collection journal article supplement (https://frontiersin.figshare.com/ndownloader/files/22448753)
Supplement: Supplementary file 1 [file 22448753]

Supplement - Explaining secondary students’ career intentions for technology and engineering jobs using an expectancy-value model

**Scales of the student questionnaire**

**General value of technology** (Cronbach's α: t1 = .71, t2 = .76)

STQ1 New technical findings normally improve people's living conditions.

STQ2 Technology is important so that we can understand the natural world.

STQ6 Technology is important for society.

STQ9 New technical findings help people to deal with each other.

**Personal value of technology** (Cronbach's α: t1 = .83, t2 = .86)

STP5 I will use technology in many ways when I grow up.

STP7 Technology is very relevant to me.

STP8 I find that technology helps me to cope better with my everyday life.

STP10 When I leave school, I will have many opportunities to use technology.

**General technological self-concept** (Cronbach's α: t1 = .84, t2 = .80)

TSC2 Although I make efforts, I have problems applying technology.

TSC3 I find it difficult to understand technical explanations.

TSC4 Nobody can do everything. I simply have no talent for technology.

TSC7 I don't like technology very much.

**School related technological self-concept** (Cronbach's α: t1 = .86, t2 = .88)

STC1 If a task in school has a technical topic, I don't find it difficult.

STC2 I follow technology easily as well as related topics at school.

STC3 When the teacher asks a question about technology, I know an answer.

STC4 I'm good at technology at school.

**Costs for learning technology** (Cronbach's α: t1 = .77, t2 = .79)

KOT1 Learning how to use technical equipment costs me too much time.

KOT2 Repairing a device myself costs me too much effort.

KOT3 It is too much effort for me to learn to understand how a technical tool functions.

KOT4 Reading a text that explains a technical process is too exhausting for me.

**Interest in creating technology** (Cronbach's α: t1 = .92, t2 = .91)

I’m interested…

ENT1 to improve a technical product in a team.

ENT2 in developing ideas for new technical products.

ENT4 in selecting materials and producing something with them in a working team.

ENT5 in inventing a new technical device.

ENT6 in developing a technical tool in a team.

**Interest in applying technology** (Cronbach's α: t1 = .87, t2 = .89)

I’m interested…

TEN1 in working with machines and other technical equipment.

TEN2 in taking things apart and repairing them (e.g. a bicycle or an alarm clock).

TEN3 in watching other people (e.g. craftsmen) do technical work.

TEN4 in repairing technical tools.

**Interest in technology for environment** (Cronbach's α: t1 = .76, t2 = .84)

I’m interested…

UMW1 in developing advertisements for environmental compatible tools.

UMW2 in finding out about the origin and energy consumption of technical equipment.

UMW3 in developing ideas for new and environmental friendly technical products.

UMW4 in critically questioning technical progress.

**Self-efficacy applying technology** (Cronbach's α: t1 = .77, t2 = .83)

I feel capable of…

NUS1 fixing a dripping faucet.

NUS2 operating a jigsaw or a grinding machine.

NUS5 changing a light bulb.

NUS7 repairing a bicycle.

NUS8 changing a battery in my cell phone.

**Enjoyment of science related technology** (Cronbach's α: t1 = .88, t2 = .89)

TEM1 I enjoy working with machines and other technical equipment (e.g. cordless screwdriver, tacker, flat pliers).

TEM2 I enjoy taking things apart and trying to repair them (e.g. the bike or a lamp).

TEM3 I am happy to help others (e.g. craftsmen, parents) with technical work.

TEM4 I like to take technical tools apart.

**Career interests in professions in the technology and engineering field** (Cronbach's α: t1 = .91, t2 = .90)

BET1 I can imagine that one day I will pursue a technical profession.

BET2 I can imagine working once in a technical company.

BET3 I could imagine working for a company that makes technical equipment.

BET4 I could imagine working in a company where I have to operate technical equipment.
